# Supplementary material for: Programmable Attenuation of Antigenic Sensitivity for a Nanobody-Based EGFR Chimeric Antigen Receptor Through Hinge Domain Truncation
Source: PubMed Central journal article supplement (PMC9354126; doi:10.3389/fimmu.2022.864868), 2022-07-22
Supplement: Presentation_1.pdf [file Presentation_1.pdf]

Llama  
Immunization

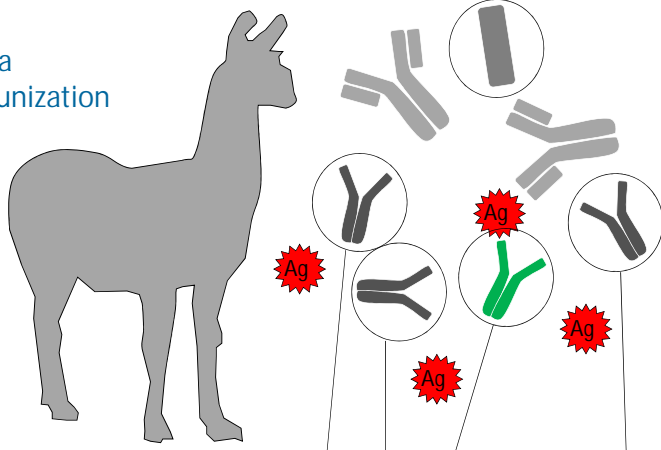

VHH Cloning &  
Phage Library  
Construction

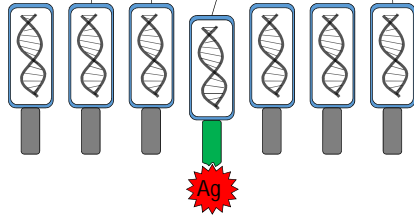

Target Panning

High Throughput  
Cell Binding  
Screen

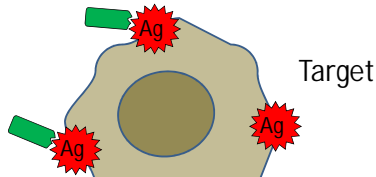

CAR-T Cloning

High Throughput  
CAR-J Screening  
(+ and - targets)

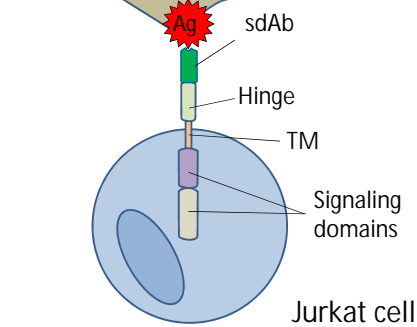

Fine tune  
Signaling  
Through Hinge  
Truncation

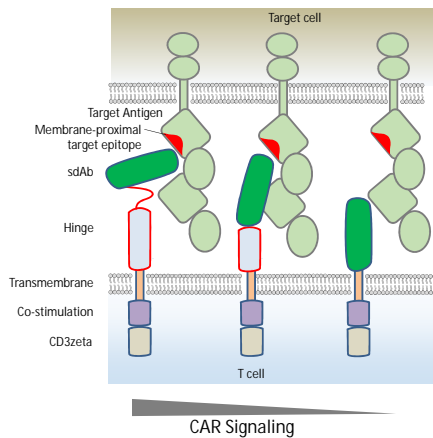

*In vitro* and *in vivo* confirmatory testing  
using primary human CAR-T cells

Supplementary figure 1: Workflow diagram for discovery and optimization for novel tumour selective CAR constructs

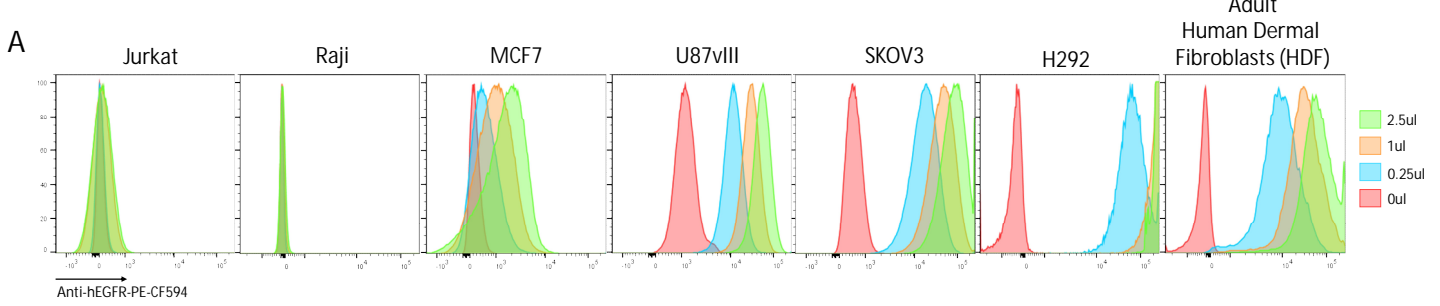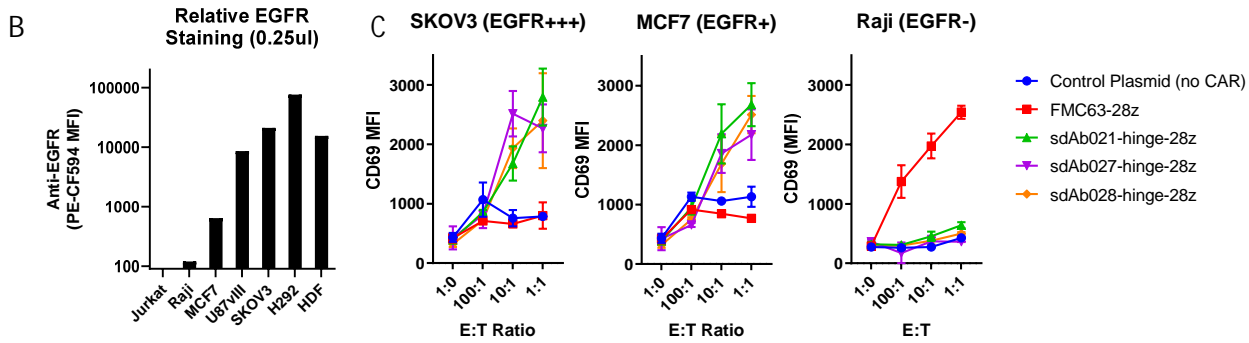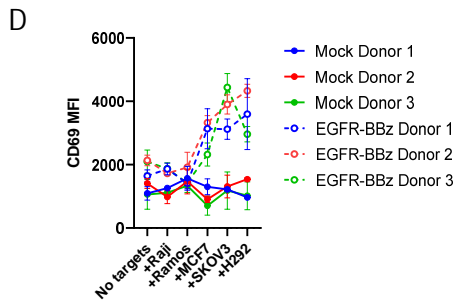

Supplemental Figure 2: EGFR-CAR-Jurkat and primary CAR-T cells can respond to EGFR-positive cells with a wide range of antigen expression

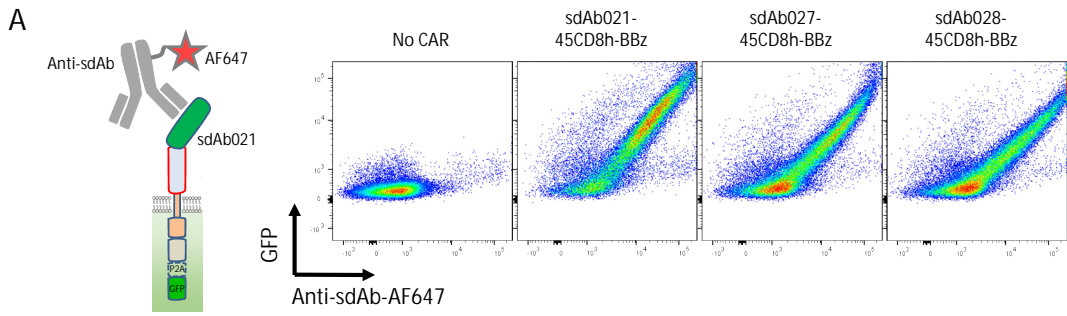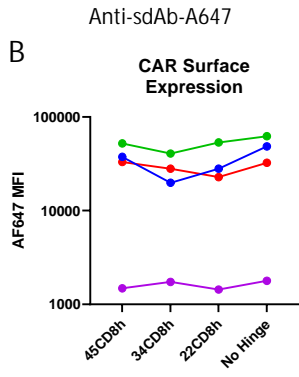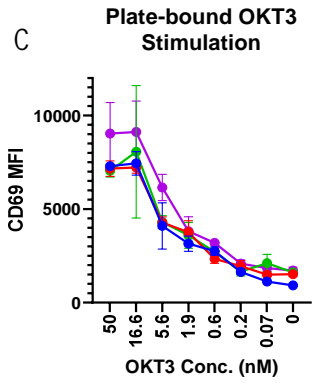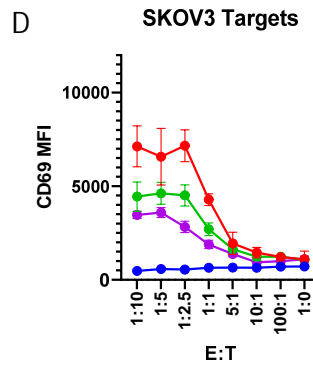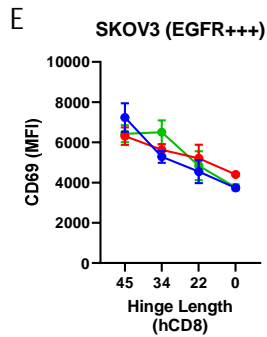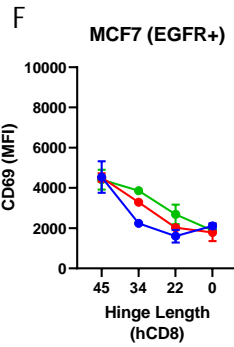

Supplemental Figure 3: CAR Surface expression is not altered with hinge domain modification

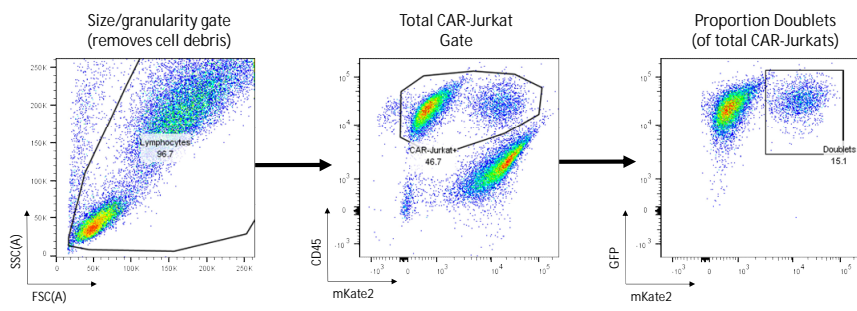

Supplemental Figure 4: Gating scheme for CAR-Jurkat target cell doublet formation assay

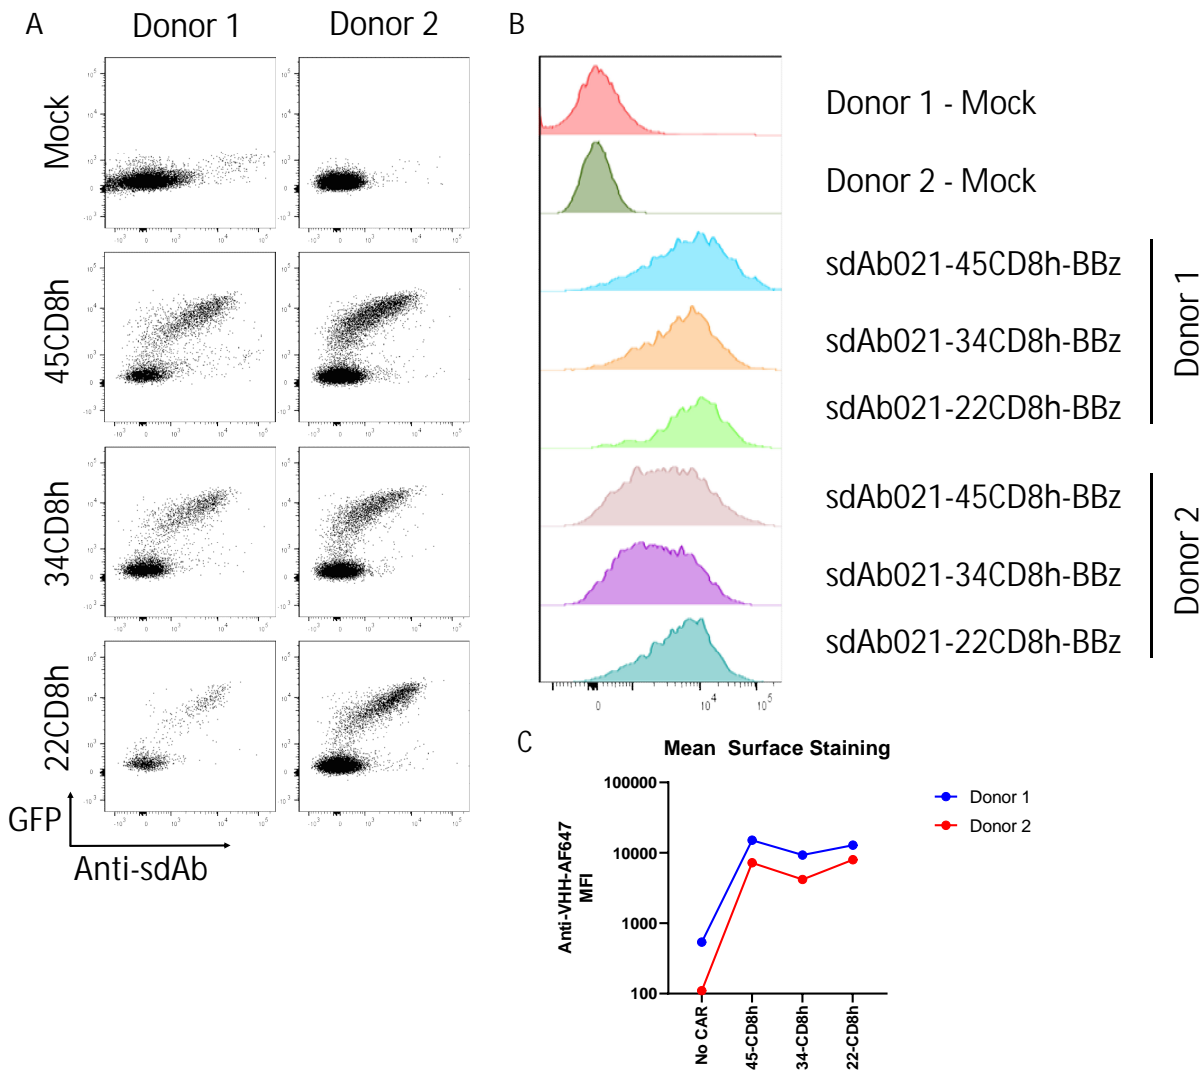

Supplemental Figure 5: CAR Surface expression in primary CAR-T cells does not correlate with hinge length

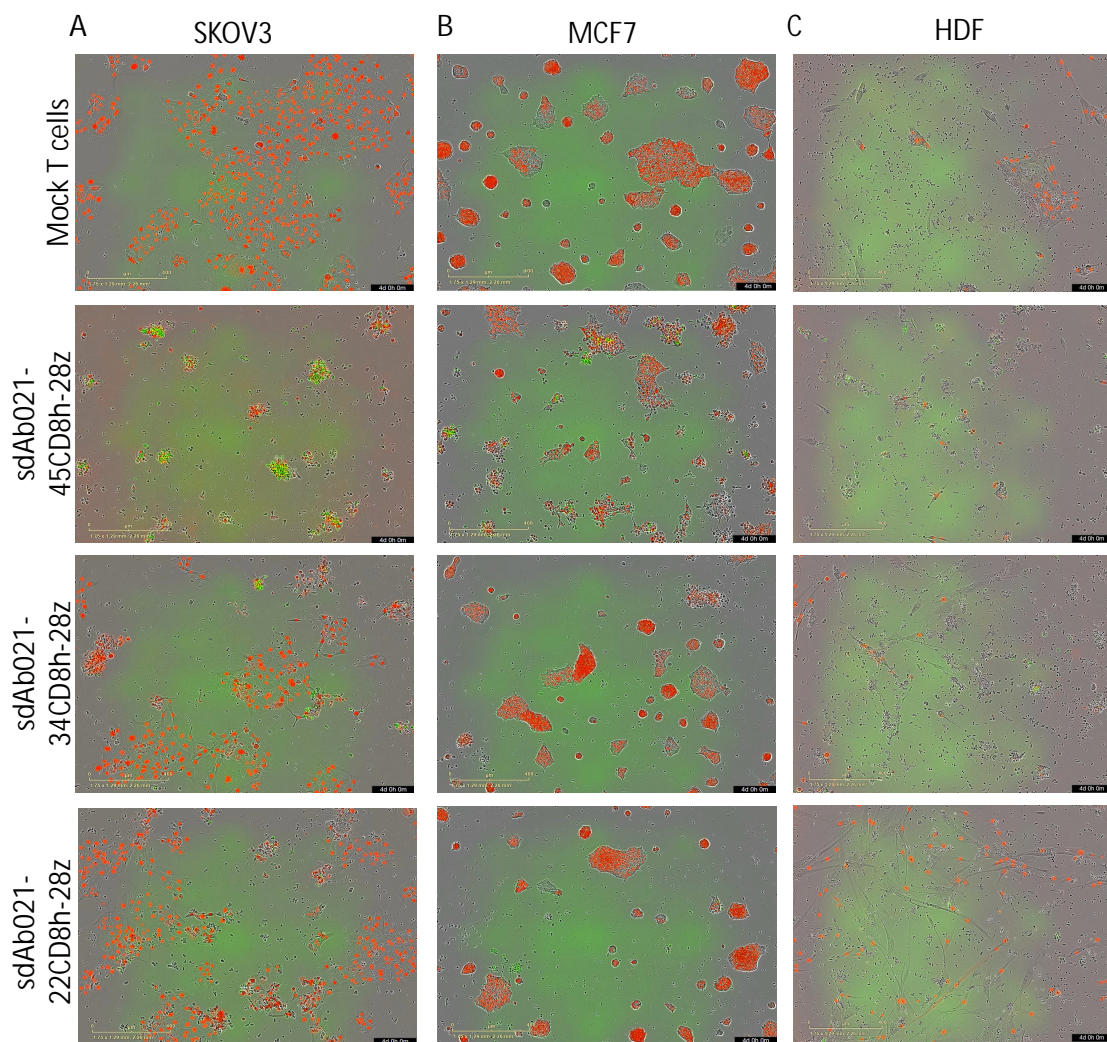

Supplemental Figure 6: Hinge truncation results in progressively reduced EGFR-sdCAR antigen responses and enhanced selectivity for EGFR-high targets

Tumour Cell Growth

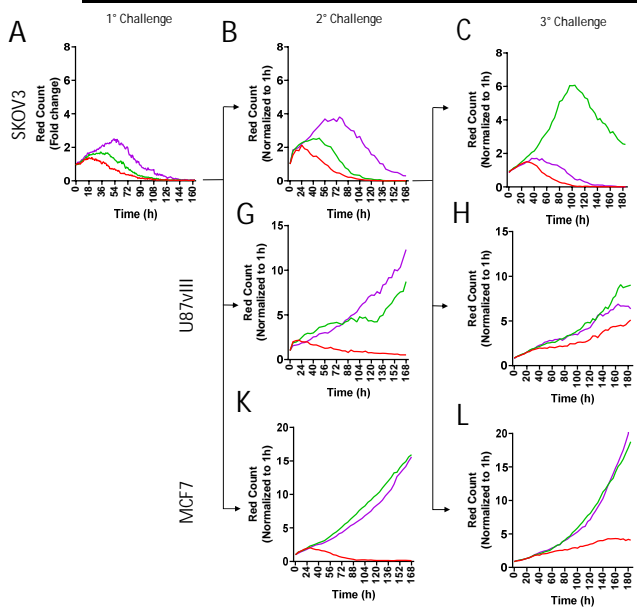

CAR-T Cell Expansion

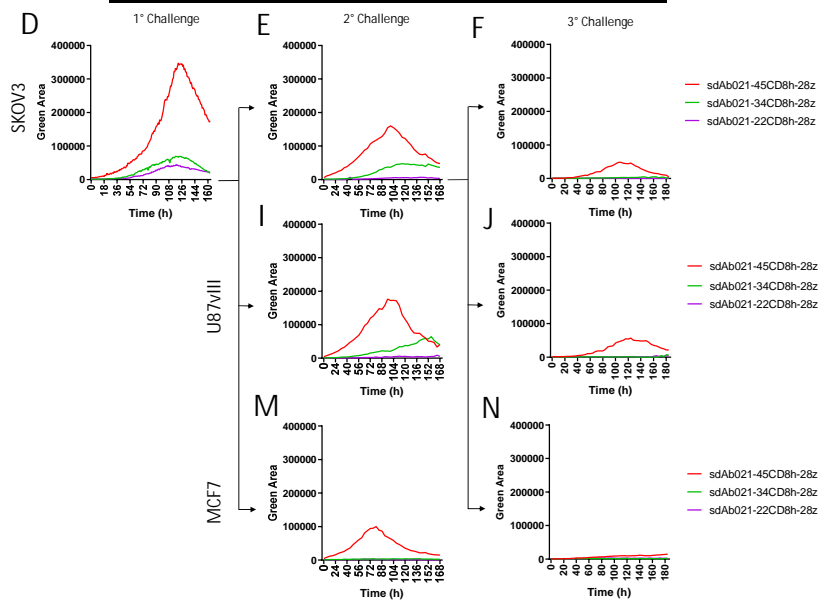

SUPPLEMENTAL Figure 7: Hinge truncated CAR-T cells maintain selectivity for target overexpressing cells following re-challenge

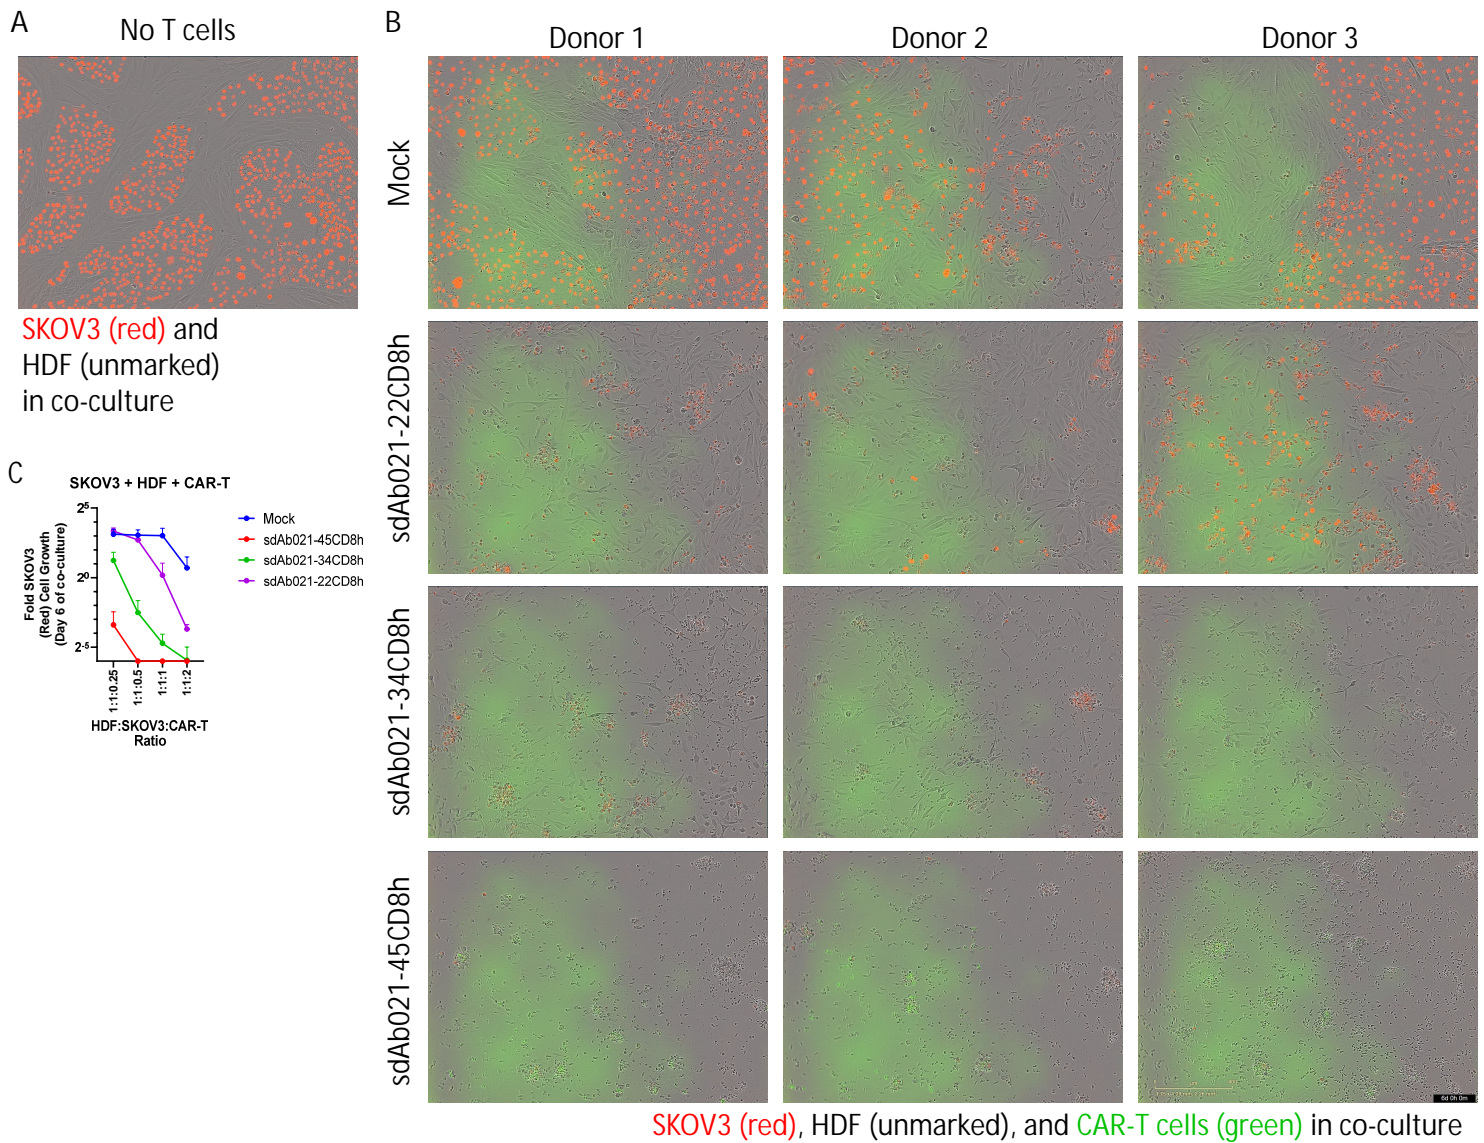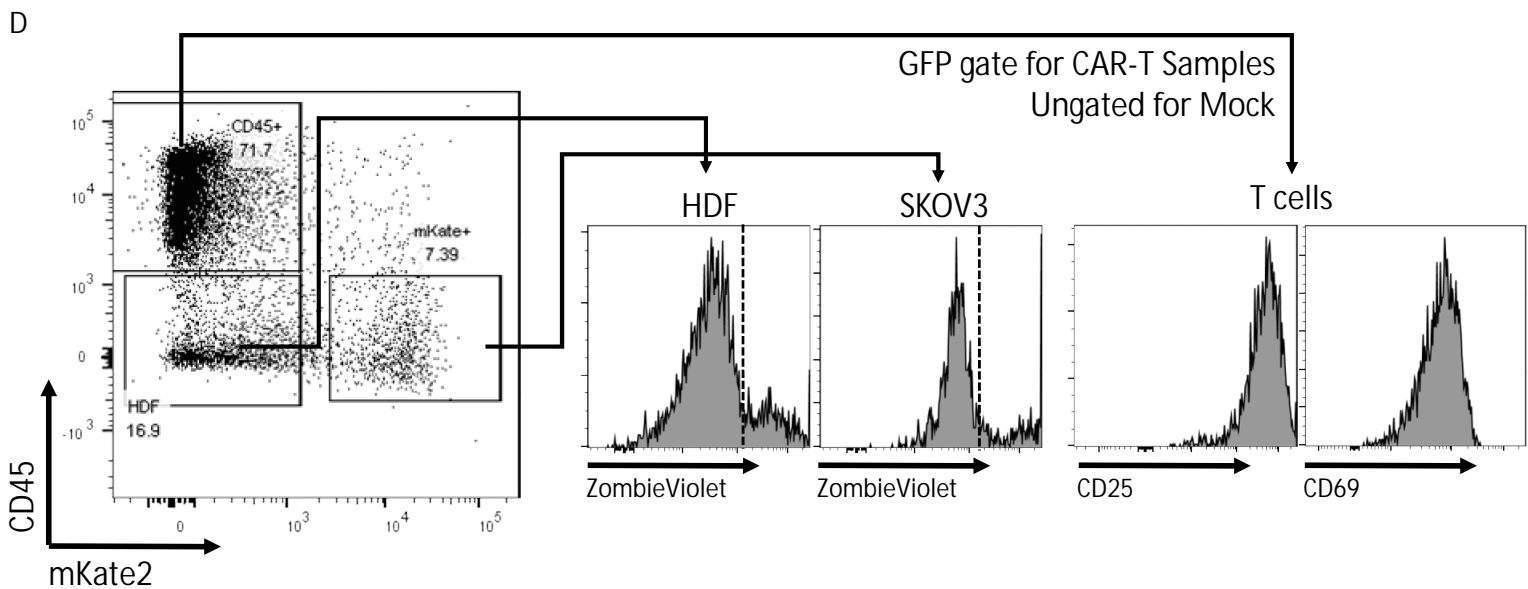

Supplemental Figure 8: Hinge truncated CAR-T cells maintain enhanced tumour selectivity in triple co-cultures with both healthy donor cells
